# Supplementary material for: Molecular identification of Bambusa changningensis is the natural bamboo hybrid of B. rigida × Dendrocalamus farinosus
Source: Front Plant Sci. 2023 Sep 1;14:1231940. doi: 10.3389/fpls.2023.1231940 (PMC10505617; doi:10.3389/fpls.2023.1231940)
Supplement: Supplementary file 2 [file DataSheet_1.xlsx]

## Sheet: Sheet1
Table S1. Details of the primers used in this study
S. No.	Primer	Forward primer(5'-3')	Reverse primer(5'-3')	Expected length/bp	Tm/ ℃	SSR Motif
1	GBSSI	AAGTTTGAGCGCATGTTCC	GGCGAGCGGCGCGATCCCTC	750	65		Ye et al. (2010)
2	SSR-1	GAGAGAGAGAGATGAGGGGA	TTCTCGGAGAAAGCTATCGC	224	56	(GA)6 (T)10
3	SSR-2	CAGAGAGAGAAGTGAGCACG	CTCCCCTCTCTCTCTCTCTC	150	57	(AG)9
4	SSR-3	GTCTTGAGCTCCACCGTCAC	TCGGAGACACAAAAGCAGCA	140	58	(CT)9
5	SSR-4	AGGTTTCTCACAGGGATTGG	CACCAAGGGAACAGAAGAGC	170	56	(GCT)5
6	SSR-5	ATCTTGTTGTACGCCTCCAT	GCCATGGAAGAGCAAGCTAA	160	58	(TGC)7
7	SSR-6	AATATACGGCTTGTCGGGAG	TCAGGATCTCTGTATGCCAT	160	53	(T)12
8	SSR-7	GAGAAACTCGCCAATCTCCC	CCGAGAAGAGTAGGGGATCG	260	58	(GGC)5 (CGAT)3
9	SSR-8	CGGGATATTTAGGCTGTGGT	CTCTGCAAGTCTGACAACAC	190	56	(GGC)5
10	SSR-9	ATGTCTTCATCGCTGTCTAC	CGAGGATGATGAGTCGTCAG	200	55	(TCC)5
11	SSR-10	CGAGAGCTTCCGGAATCCTG	GCCGACTCCAAAACCCTAGA	225	57	(TC)7
12	SSR-11	CAGCCTCCATGAAATCCCTC	CGCTGTCCATTTACACCGTA	240	57	(CTG)5
13	SSR-12	GTTGTGCCATCATGTGACAG	TGCAACTCAAGATTATGGGC	150	55	(T)13
14	SSR-13	AAGGAGTATATTCCAGGGAT	TCTGTCTTCACAACTCAAGT	200	53	(C)11 (TTTC)3
15	SSR-14	CGCTCGTCGTCTCCTTCGTT	CGGCGAGAAGATCCCGAGCA	135	65	(AGC)5
16	SSR-15	ATCTCGGACACATTTGACGG	CGACGCATGAAACCACGAAA	190	58	(GTC)5
17	SSR-16	AACAGCTATACCCTCGGCTC	TGCATAAAAACGGCTTCCCC	230	58	(GGGA)4
18	SSR-17	AGAACGGCAGCTTCTCCTCC	CCAGGCACGTGTATACGAC	210	60	(CGTA)4
19	SSR-18	AAAGCAAAGAGCTGTTCTGT	CTGCTCCAATTAGTGTGCAT	260	55	(G)14
20	SSR-19	CAAGTGACATAAAGGGTGGC	AGGAAGGTGAACAGAAGAGT	180	56	(AGC)6
21	SSR-20	AAACAAAATGCAGAAATGGT	CACACACATAAAACCAATCA	200	51	(TTG)6
22	SSR-21	GATGACGTCGGGGGATAAGA	TCCCTCACAAAAACCTCCCT	259	56	(GCCTCG)3
23	SSR-22	ACGAAGACGACGACGACGAC	TACGGCGATGGAAGCAAGGT	137	60	(GAC)6
24	SSR-23	GTGGACCTGTGGTATGAGAC	AAACTATCCTCGCTGCAATT	190	57	(A)11
25	SSR-24	CAAGCTCCCACAGAACCTCC	AGACAACACACCGCGCTTAT	194	59	(AG)8
26	SSR-25	AGTTGATGGGCAAAACTTCT	AAAACCAATCTGTTCTCGGC	200	57	(T)10
27	SSR-26	GGTGGAGAGGGAGGAGGAGA	TCCAAAGAAGCCCCTCCCTT	210	62	(GAG)5
28	SSR-27	AGAGAGAGAGAGAGAGAGAG	TTTCCTCTTTGATTGCTTCC	200	52	(AG)10
29	SSR-28	CTGTTGCCGGAGTCCATCAC	CTCGTGGTTTGGGCTCTTGT	170	60	(CAC)5
30	SSR-29	TAGGTGAACTTGTGGTAATG	TCAAGGATTAAGTTAGCCCA	210	53	(AGAGAA)3
31	SSR-30	GAGCCGAAGGAGCAACTCTT	CATCGTCTTCCACCCCTCAC	170	60	(GAA)5
32	SSR-31	GAATCCCCTCGACAATAGCTC	GATAAGGCGGCAGTGCTCC	200	58	(AGG)4
33	SSR-32	GTGCTCATGGACCCCTACCC	GCTCACGTACAACGACGACT	169	60	(CTAG)3
34	SSR-33	ATCGAGAACGACCTCATAGGC	GACCCGTGGACAGTATCAGC	199	59	(GCT)6
35	SSR-34	AAAGGAGAACACGACGCGAGA	GTTGGTAGCTCGCCGGACTCA	160	60	(GCCTC)3
36	SSR-35	CTAGATATTCCGTGACTCGAAG	GTCACCCGCATCTACAGAC	169	57	(CT)6
37	SSR-36	CACCTGCAGCAGCGGCGGAA	CACGGAGACAGAGCGGGCCAC	165	65	(CTC)4
38	SSR-37	TATAAAAATTTGGAGCAGGAGCA	GTAACTAAGCACCGGATTG	182	53	(AAAT)4
39	SSR-38	TGGTATTCTAATTCGGGAGGA	TCGAGAAAAAAAGACCAACGA	168	54	(T)10 A(11)
40	SSR-39	GAAGGAGGAGAACGGGGAGGG	TCTCTCTCTCTCTCCATTGCAGC	202	60	(GA)7
41	SSR-40	GGGAGGAGGAGGAGAAGCTG	GGGGAGATCCACGAGGGACA	196	61	(GGA)4
42	SSR-41	TCTGCTGCTCCAATTTGACC	CTGATAACCTGCAGCAGCAG	168	56	(GCT)4
43	SSR-42	ACACATTACAAATACGCCACAC	GTTCGTCGTCAAGCCCAAG	199	58	(GGC)4
44	SSR-43	TTCTCAAGCACCTCCACGACCAG	CCACCATTCGGGAGAACCAGT	191	65	(CTGC)3
45	SSR-44	TCCGTCCATCCATCTCGCCA	GAACACGCGCACAGCTAGCC	180	62	(CCCT)3 (CGTA)3
46	SSR-45	TCCATAGAACATCTGGCGTA	TTTTCAATGGCTTCTCTTGC	189	54	(AATA)3
47	SSR-46	AACAGATGCCAGAGTGGAAG	TAACTAAGCACCGGATTGCG	207	55	(AAAT)4
48	SSR-47	AATCAACACAGCCCACCT	GTGGACACGGAGACAGAGC	183	57	(CTC)4
49	SSR-48	CGCGACCGTTAAGTCCATTA	TTGAGGTTGATGATGTCCTG	189	54	(GCC)4
50	SSR-49	CTCTTGGAATCAGTCAGAGCG	ATCACCATGGGCAAGATCC	196	55	(AGG)4
51	SSR-50	TGTGTTGTGTTGTGTTGTGT	GTAATTCGCACTTCGCGTTG	153	55	(GTTGT)5
52	SSR-51	TGGCAACGGACTTCTTCGTA	CATGGGCAATACAAGGTTT	166	56	(TGG)5
53	SSR-52	CTTCTGCGAGCTGATCACC	CAAGCGATCCAAGAAACCAAG	173	57	(AGCT)3
54	SSR-53	TGAATTGCCCTCTAGGTGGA	ACCCAAATGTTTCACAAGAGC	165	57	(TGG)5
55	SSR-54	AAAGTGTGGAGGCCGCTGTCT	CAATGCCGCCAACACCCCTCT	199	66	(CGG)4
56	SSR-55	TGACTTTAACCCCAAATTGCAG	AATGCCTGTAGTTGCTAACCTTG	190	57	(G)16
57	SSR-56	CTCCGTGACGCCGTTCAGC	CCCACTCCAATGCCAAACCCT	159	62	(GCC)5(GAG)4
58	SSR-57	AAATCCCTTCTACGGAATTGC	GACTTCCCTCTCCACCGTG	180	57	(AGC)4(GAGG)3
59	SSR-58	CGCAGCTTCATCCAACCGAC	AGAAGCCGAACGATCTTGCTC	150	60	(GTG)4
60	SSR-59	TTGTACGTGTCCGCCCACTC	CGACGACCACAAGAACCTCC	171	60	(CTT)4
61	SSR-60	CACAAGTAAATGCCGGGTCA	TAGGGCACGACACATAGTCA	142	58	(CATG)3
62	SSR-61	GTGCTCATGGACCCCTACCC	GCTCACGTACAACGACGACT	169	60	(CTAG)3
63	SSR-62	AGAAGACATCTTTGATACGC	CAATTTAACCAAAACTCAGGC	142	53	(ATTA)5
64	SSR-63	AAAGGAGAACACGACGCGAGA	GTTGGTAGCTCGCCGGACTCA	160	60	(GCCTC)3
65	SSR-64	CAGCTCTCTTCCTCGGGTT	AACATAGGAATAGGCGTCCACT	169	60	(CGG)5
